# Supplementary material
Source: PubMed Central journal article supplement (PMC2291423)

## E07-06-0547 Uccelletti

**Fig.S1** Substrate specificity rescue of NDPase activity by APY-1 expression in a yeast mutant. Total membranes were obtained from *gdal* mutant cells transformed with empty vector (p426, *gray bars*) or the vector carrying APY-1 (p426-APY-1, *black bars*). Nucleotide concentrations were 2 mM in the presence of 2 mM CaCl<sub>2</sub>. The values are the mean ± S.D. of three independent experiments.

**Fig.S2** Nucleotidase activities and catalytic properties of *C. elegans* crude membranes. (A and B) Membrane fractions from *C. elegans* N2 and *ire-1* strains respectively, grown at 16°C and then treated and not with tunicamycin 5 µg/ml for 6 h, were incubated with nucleotides (2 mM) in the presence of 2 mM CaCl<sub>2</sub>. Values are means ± S.D. of four independent experiments. (C) pH dependence of UDPase activity of total membrane fractions from N2 worms. (D) Determination of metal cation dependence of UDPase activity of total membrane fractions from N2 worms.

**Fig.S3** Effects of *apy-1* (RNAi) inactivation on lifespan and aging in *daf-2* strain. (A) Lifespan analysis of *apy-1* (RNAi by feeding) and *daf-2* mock worms. Survival is plotted against days of adulthood, where 0 is the L4 larvae phase. Error bars represents SD; n=60 for each data point of single experiment. Figure shows the mean of three independent experiments. (B and C) Mean pharyngeal pumping rate and frequency of body bends respectively, of *apy-1* (RNAi) animals and *daf-2* mock treated animals for the indicated period of time. Error bars, SD; n=60 for each treatment, histogram shows the mean of three different experiments.

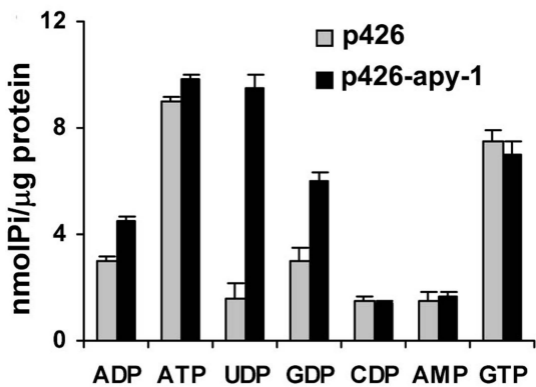

Fig S1

**A**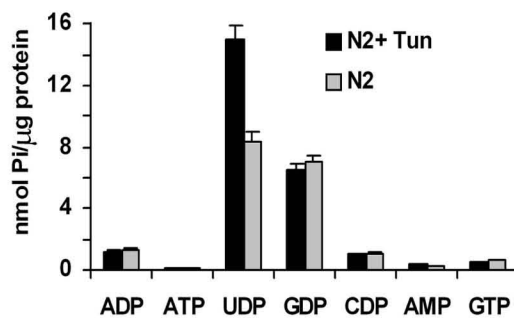**B**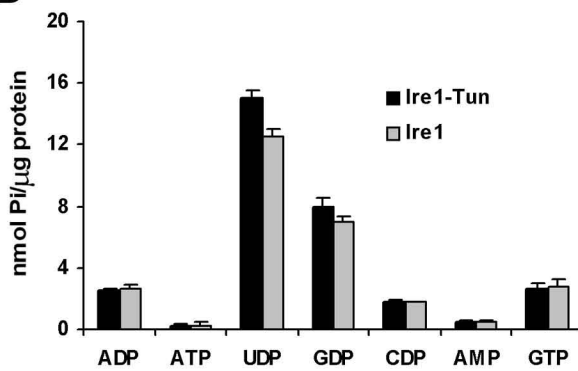**C**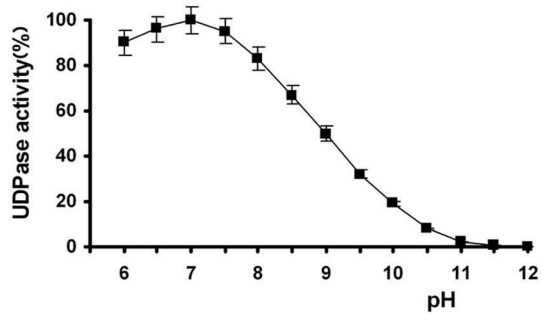**D**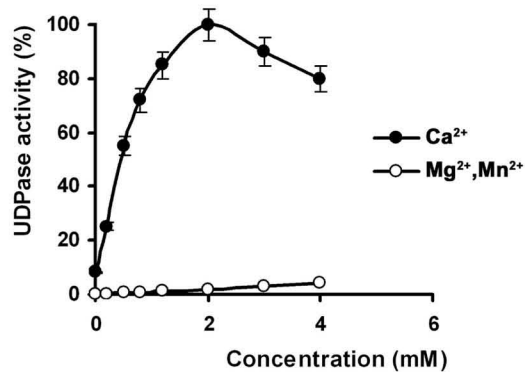

**A**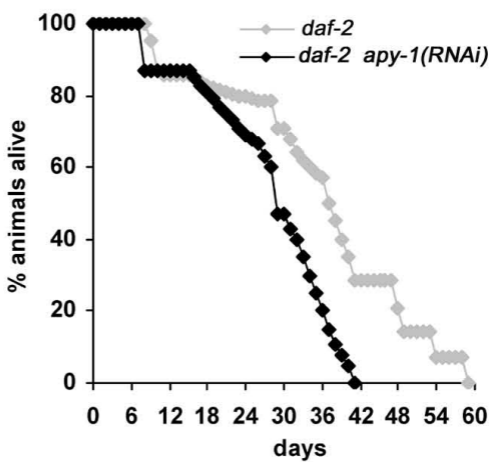**B**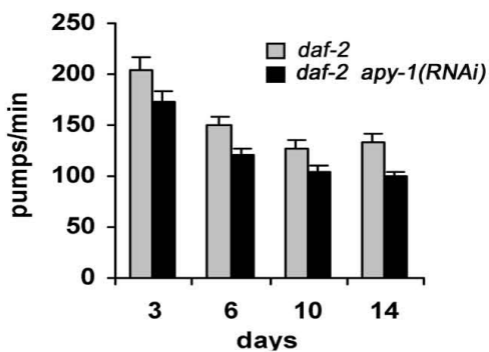**C**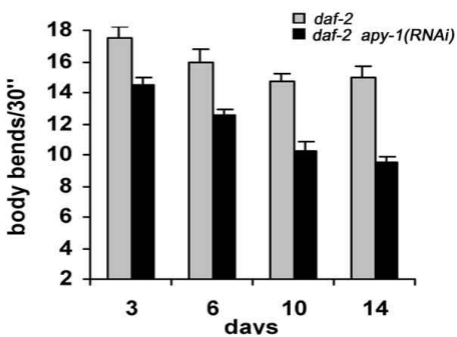

Supplement: mbc_E07-06-0547_1.pdf [file mbc_E07-06-0547_1.pdf]
